## RESEARCH ARTICLE

## Variable effects of underlying diseases on the prognosis of patients with COVID-19

Yong Jun Choi<sup>1</sup>, Ju-Young Park<sup>2</sup>, Hye Sun Lee<sup>2</sup>, Jin Suh<sup>1</sup>, Jeung Yoon Song<sup>1</sup>, Min-Kwang Byun<sup>1</sup>, Jae Hwa Cho<sup>1</sup>, Hyung Jung Kim<sup>1</sup>, Hye Jung Park<sup>1\*</sup>

**1** Department of Internal Medicine, Gangnam Severance Hospital, Yonsei University College of Medicine, Seoul, South Korea, **2** Biostatistics Collaboration Unit, Yonsei University College of Medicine, Seoul, South Korea

\* [craft7820@yuhs.ac](mailto:craft7820@yuhs.ac)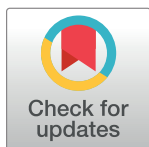**OPEN ACCESS**

**Citation:** Choi YJ, Park J-Y, Lee HS, Suh J, Song JY, Byun M-K, et al. (2021) Variable effects of underlying diseases on the prognosis of patients with COVID-19. PLoS ONE 16(7): e0254258. <https://doi.org/10.1371/journal.pone.0254258>

**Editor:** Xia Jin, Translational Medical Research Institute, Shanghai Public Health Clinical Center, Fudan University, CHINA

**Received:** June 16, 2020

**Accepted:** June 23, 2021

**Published:** July 19, 2021

**Copyright:** © 2021 Choi et al. This is an open access article distributed under the terms of the [Creative Commons Attribution License](https://creativecommons.org/licenses/by/4.0/), which permits unrestricted use, distribution, and reproduction in any medium, provided the original author and source are credited.

**Data Availability Statement:** The patients' data contain potentially identifying or sensitive patients' information. There are ethical or legal restrictions on sharing of the dataset without the permission of the HIRA. The HIRA supervised the data release, and the datasets are only accessible for a limited time, for permitted research (<https://opendata.hira.or.kr/home.do>). Unfortunately, that open source data is currently no longer available because of the end of the access allowance period. Instead, stable source data for long term requirement is available at National Health Insurance Sharing Service

**Abstract**

Underlying diseases might be risk factors for poor prognosis in patients with coronavirus disease (COVID-19); however, we still do not know whether these diseases are independent factors affecting prognosis, which type of underlying diseases are risk factors, and which type of clinical outcomes are affected. We retrospectively reviewed cohort data from 7,590 de-identified patients with COVID-19 who were diagnosed using severe acute respiratory syndrome-coronavirus-2 RNA polymerase chain reaction test up to May 15, 2020. We used linked-medical claims data provided by the Health Insurance Review and Assessment Service in South Korea. Underlying diseases were identified using the diagnostic codes in the patients' files from January 1, 2019 to December 31, 2019. The total mortality rate was 3.0% in patients with COVID-19. After adjusting for age, sex, and concomitant chronic conditions, we found that congestive heart failure, chronic pulmonary diseases, diabetes without chronic complications, renal diseases, and malignancy were factors that significantly increased the cost of treatment. Cerebrovascular disease, chronic pulmonary disease, and paralysis were found to be independent factors significant in prolonging hospital stay. Diabetes with chronic complications was independently associated with intensive care unit admission. In addition, underlying congestive heart failure (odds ratio [OR], 1.724;  $P = 0.003$ ), dementia (OR, 1.598;  $P = 0.012$ ), diabetes with and without chronic complications (OR, 1.821;  $P = 0.002$  and OR, 1.518;  $P = 0.022$ , respectively), renal disease (OR, 2.299;  $P = 0.002$ ), and malignancy (OR, 1.529;  $P = 0.039$ ) were significant factors associated with death, even after adjustments. Underlying diseases were significant independent factors of the poor prognosis in patients with COVID-19. The effects were variable according to the type of underlying disease and clinical outcome. Therefore, patients with COVID-19 with underlying diseases should be monitored more closely because they are more at risk of a poor prognosis.

**Introduction**

Coronavirus disease-19 (COVID-19), as named by the World Health Organization (WHO), has rapidly spread across the world. The WHO has announced that old age and underlying

(<https://nhiss.nhis.or.kr>) or HIRA Healthcare Big-data Hub (<https://opendata.hira.or.kr>) only for approved studies.

**Funding:** The authors received no specific funding for this work.

**Competing interests:** The authors have declared that no competing interest exist.

**Abbreviations:** CI, confidence interval; COVID-19, coronavirus disease; HIRA, Health Insurance Review and Assessment Service; OR, odds ratio.

medical conditions are major risk factors for a poor prognosis in patients with COVID-19, based on simple unadjusted values (accessible at: <https://www.who.int/docs/default-source/coronaviruse/situation-reports/20200311-sitrep-51-covid-19.pdf>). There are several reasons why underlying diseases may affect prognosis in patients with COVID-19. First, an underlying disease affects the immunity, nutritional status, and general well-being of the patient—factors that play a critical role in overcoming infections, including COVID-19 [1]. Second, the medications prescribed for underlying diseases might limit the use of pharmacologic agents against COVID-19 because of possible drug-to-drug interactions or toxicity from concurrent drug use [2]. Third, underlying diseases are more commonly found in the older population; therefore, COVID-19 can cause lethal outcomes in old age [3].

Recent studies have revealed the prevalence of underlying diseases in patients with COVID-19 and in those who died from the disease [4,5]. Other studies have shown that the mortality rate was increased from the COVID-19 pandemic based on underlying diseases [6]. However, to the best of our knowledge, there have been no studies on 1) whether underlying diseases are independent risk factors for a poor prognosis, even after adjusting for age, sex, and other medical conditions; 2) which underlying diseases significantly affect the prognosis of patients with COVID-19; and 3) which type of COVID-19 clinical outcomes, such as hospital costs and prolonged hospital stay, are affected by underlying diseases. Further epidemiological data are urgently needed to increase the awareness of the association between underlying diseases and COVID-19 and to define which diseases pose a higher risk of poor prognosis.

In this study, we aimed to reveal the various effects of underlying diseases on the prognosis of COVID-19.

## Materials and methods

### Patients and data

The Ministry of Health and Welfare of Korea and Health Insurance Review and Assessment Service (HIRA) of South Korea came up with the world's first de-identified nationwide COVID-19 medical claims data that included the entire South Korean population (accessible at <https://hira-covid19.net>). They released the de-identified list of 7,590 patients confirmed as having COVID-19 via an RNA polymerase chain reaction test conducted up until May 15, 2020. All 7,590 patients were included in this study. The diagnostic codes for COVID-19 in the HIRA claims data are as follows: B34.2, coronavirus infection in unspecified area; B97.2, coronavirus as the cause of other diseases in other chapters; U18, tentative designation or emergency use of a new disease in South Korea; U18.1, novel coronavirus infection; and U07.1, COVID-19.

South Korea has a unique national health insurance system that provides insurance for all its citizens. All the medical records and visits are logged in the claims data. HIRA also provided data on the patients with COVID-19' history of availing medical services for the past 3 years (using finalized claims data, from January 2017 to May 2020). We collected these claims data to analyze the prevalence of underlying disease and clinical outcomes in the patients with COVID-19.

### Underlying disease and Charlson's Comorbidity Index

We classified 17 underlying diseases (myocardial infarction, congestive heart failure, peripheral vascular disease, cerebrovascular disease, dementia, chronic pulmonary disease, rheumatologic disease, peptic ulcer disease, mild liver disease, diabetes without chronic complications, diabetes with chronic complications, paralysis such as hemiplegia or paraplegia, renal disease, malignancy including leukemia and lymphoma, moderate or severe liver disease, metastatic

solid tumor, and acquired immune deficiency syndrome/human immunodeficiency virus) that are known to affect mortality rates and frequently used to calculate Charlson's Comorbidity Index (CCI) [7]. These underlying diseases were defined by selecting the diagnostic codes that showed up at least once in the patient's claim data from January 1, 2019 to December 31, 2019; the said codes, used to define the comorbidities were based on widely-accepted guidelines by HIRA (accessible at <https://opendata.hira.or.kr/op/opb/selectRfrm.do?rfrmTpCd=&searchCnd=&searchWrd=&sno=11200&pageIndex=1>). The CCI, which facilitates the prediction of prognosis and mortality, was calculated as previously described, and according to the HIRA guidelines (S1 Table) [7,8].

## Clinical outcomes

To study the clinical outcomes, we evaluated mortality, admission to intensive care unit (ICU), duration of admission, and total hospital cost for COVID-19 treatment. Mortality and ICU admission were defined based on the associated intervention codes and medical records, respectively. Duration of admission was defined as the length of hospital stay from admission to discharge for a patient with COVID-19. Total hospital cost was defined as the sum of the expenses incurred for all the medical claims records during the treatment period for COVID-19.

## Ethics

This study was approved by the Institutional Review Board of Gangnam Severance Hospital (number: 3-2020-0067). The informed consent requirement was waived due to the minimal risk and retrospective nature of this study using data from the databases.

## Statistical analyses

We used a chi-square test to define significant differences in mortality rates among patients grouped according to underlying diseases. We used linear and logistic regression analyses to define the risk factors for the clinical outcomes. The data were analyzed using SAS Enterprise version 6.1 (SAS Institute Inc., Cary, NC, USA). A  $P < 0.05$  was used to indicate statistical significance.

## Results

### Clinical characteristics and outcomes of patients with COVID-19

There were 7,590 patients with COVID-19 included in this study. The majority of patients with COVID-19 were in the 20–29 years age group, followed by those in the 50–59- and 60–69-years age groups (24.4%, 19.8%, and 14.0%, respectively). The patients with COVID-19 were predominantly females (59.2%). Among the 17 underlying diseases, chronic pulmonary disease (44.6%), mild liver disease (36.2%), and peptic ulcer disease (32.1%) were the most prevalent.

The total mortality rate was 3.0% in this study. Patients <60 years old showed a relatively low mortality rate (0–0.9%); while those >60 years old showed higher mortality rates (60–69 years old, 3.4%;  $\geq 70$  years old, 18.0%). The mortality rate in males (3.9%) was significantly higher than that in females (2.4%;  $P < 0.001$ ). The mortality rate in people with underlying diseases (except acquired immune deficiency syndrome) was significantly higher (4.4–19.1%) than that in people without underlying diseases (Table 1).

### Significant factors for mortality

All the variables except that of having acquired immune deficiency syndrome were found to be significant factors that influenced mortality in univariate analysis. After adjusting for other

**Table 1. Clinical characteristics and outcomes of patients with COVID-19.**

| Parameters                              | N (%)                        | Mortality (%)      |
|-----------------------------------------|------------------------------|--------------------|
| <b>Age (years)</b>                      |                              |                    |
| 0–9                                     | 82 (1.1%)                    | <b>0 (0.0%)</b>    |
| 10–19                                   | 346 (4.6%)                   | <b>0 (0.0%)</b>    |
| 20–29                                   | 1,855 (24.4%)                | <b>0 (0.0%)</b>    |
| 30–39                                   | 776 (10.2%)                  | <b>2 (0.3%)</b>    |
| 40–49                                   | 1,003 (13.2%)                | <b>1 (0.1%)</b>    |
| 50–59                                   | 1,503 (19.8%)                | <b>14 (0.9%)</b>   |
| 60–69                                   | 1,061 (14.0%)                | <b>36 (3.4%)</b>   |
| 70+                                     | 964 (12.0%)                  | <b>174 (18.0%)</b> |
| <b>Sex</b>                              |                              |                    |
| Male                                    | 3,095 (40.8%)                | <b>121 (3.9%)</b>  |
| Female                                  | 4,495 (59.2%)                | <b>106 (2.4%)</b>  |
| <b>Charlson's comorbidity index</b>     |                              |                    |
| 0                                       | 2,029 (26.7%)                |                    |
| 1                                       | 1,774 (23.4%)                |                    |
| 2                                       | 1,219 (16.1%)                |                    |
| ≥3                                      | 2,568 (33.8%)                |                    |
| <b>Prevalence of underlying disease</b> |                              |                    |
| Myocardial infarction                   | 199 (2.6%)                   | <b>19 (9.6%)</b>   |
| Congestive heart failure                | 507 (6.7%)                   | <b>85 (16.8%)</b>  |
| Peripheral vascular disease             | 1,064 (14.0%)                | <b>90 (8.5%)</b>   |
| Cerebrovascular disease                 | 787 (10.4%)                  | <b>84 (10.7%)</b>  |
| Dementia                                | 568 (7.5%)                   | <b>110 (19.4%)</b> |
| Chronic pulmonary disease               | 3,388 (44.6%)                | <b>151 (4.5%)</b>  |
| Rheumatologic disease                   | 561 (7.4%)                   | <b>25 (4.5%)</b>   |
| Peptic ulcer disease                    | 2,437 (32.1%)                | <b>108 (4.4%)</b>  |
| Mild liver disease                      | 2,747 (36.2%)                | <b>132 (4.8%)</b>  |
| Diabetes without chronic complications  | 1,775 (23.4%)                | <b>146 (8.2%)</b>  |
| Diabetes with chronic complications     | 506 (6.7%)                   | <b>70 (13.8%)</b>  |
| Paralysis (hemiplegia or paraplegia)    | 145 (1.9%)                   | <b>24 (16.6%)</b>  |
| Renal disease                           | 162 (2.1%)                   | <b>31 (19.1%)</b>  |
| Malignancy                              | 557 (7.3%)                   | <b>53 (9.5%)</b>   |
| Moderate or severe liver disease        | 26 (0.3%)                    | <b>3 (11.5%)</b>   |
| Metastatic solid tumor                  | 61 (0.8%)                    | <b>7 (11.5%)</b>   |
| Acquired immune deficiency syndrome     | 7 (0.1%)                     | <b>1 (14.3%)</b>   |
| <b>Prognosis</b>                        |                              |                    |
| Total hospital cost (dollars*)          | 4,293.4±5,549.1 <sup>#</sup> |                    |
| Duration of admission (days)            | 20.1±12.2 <sup>#</sup>       |                    |
| Admission to ICU                        | 215 (2.8%)                   |                    |
| Mortality                               | 227 (3.0%)                   |                    |
| <b>Total</b>                            | <b>7,590</b>                 | <b>227 (3.0%)</b>  |

\* 1 dollar = 1,228.40 Korean Won as of June 1, 2020.

<sup>#</sup> mean±standard deviation.

Text in bold means a statistically significant difference.

COVID-19, coronavirus disease; ICU, intensive care unit.

<https://doi.org/10.1371/journal.pone.0254258.t001>

Table 2. Significant factors for mortality.

| Parameters                              | Univariate analysis |               |         | Multivariate analysis |                    |                  |
|-----------------------------------------|---------------------|---------------|---------|-----------------------|--------------------|------------------|
|                                         | OR                  | 95% CI        | P-value | OR                    | 95% CI             | P-value          |
| Age (years)                             | 1.127               | 1.114–1.141   | <0.001  | <b>1.114</b>          | <b>1.097–1.131</b> | <b>&lt;0.001</b> |
| Sex (female)                            | 0.594               | 0.45–0.774    | <0.001  | <b>0.385</b>          | <b>0.280–0.529</b> | <b>&lt;0.001</b> |
| <b>Prevalence of underlying disease</b> |                     |               |         |                       |                    |                  |
| Myocardial infarction                   | 3.645               | 2.228–5.965   | <0.001  | 0.616                 | 0.342–1.108        | 0.106            |
| Congestive heart failure                | 9.846               | 7.395–13.108  | <0.001  | <b>1.724</b>          | <b>1.211–2.456</b> | <b>0.003</b>     |
| Peripheral vascular disease             | 4.310               | 3.276–5.670   | <0.001  | 1.063                 | 0.761–1.484        | 0.721            |
| Cerebrovascular disease                 | 5.566               | 4.205–7.368   | <0.001  | 0.779                 | 0.540–1.125        | 0.184            |
| Dementia                                | 14.174              | 10.745–18.697 | <0.001  | <b>1.598</b>          | <b>1.108–2.305</b> | <b>0.012</b>     |
| Chronic pulmonary disease               | 2.532               | 1.915–3.349   | <0.001  | 1.208                 | 0.867–1.684        | 0.264            |
| Rheumatologic disease                   | 1.576               | 1.031–2.411   | 0.036   | 1.144                 | 0.700–1.870        | 0.592            |
| Peptic ulcer disease                    | 1.962               | 1.505–2.557   | <0.001  | 0.831                 | 0.604–1.143        | 0.255            |
| Mild liver disease                      | 2.523               | 1.930–3.298   | <0.001  | 0.856                 | 0.610–1.200        | 0.366            |
| Diabetes without chronic complications  | 6.345               | 4.810–8.371   | <0.001  | <b>1.518</b>          | <b>1.063–2.169</b> | <b>0.022</b>     |
| Diabetes with chronic complications     | 7.084               | 5.259–9.542   | <0.001  | <b>1.821</b>          | <b>1.255–2.644</b> | <b>0.002</b>     |
| Paralysis (hemiplegia or paraplegia)    | 7.076               | 4.469–11.205  | <0.001  | 1.703                 | 0.980–2.959        | 0.059            |
| Renal disease                           | 8.731               | 5.758–13.241  | <0.001  | <b>2.299</b>          | <b>1.371–3.858</b> | <b>0.002</b>     |
| Malignancy                              | 4.146               | 3.009–5.713   | <0.001  | <b>1.520</b>          | <b>1.022–2.257</b> | <b>0.039</b>     |
| Moderate or severe liver disease        | 4.274               | 1.274–14.339  | <0.001  | 1.482                 | 0.328–6.694        | 0.609            |
| Metastatic solid tumor                  | 4.307               | 1.938–9.572   | <0.001  | 2.112                 | 0.787–5.667        | 0.138            |
| Acquired immune deficiency syndrome     | 5.426               | 0.651–45.253  | 0.118   | 7.080                 | 0.462–108.575      | 0.160            |

The text in bold means statistically significant difference in multivariate analysis.

OR, odds ratio; CI, confidence interval.

<https://doi.org/10.1371/journal.pone.0254258.t002>

factors, old age (odds ratio [OR], 1.114; 95% confidence interval [CI], 1.097–1.131;  $P < 0.001$ ) and male sex (OR for female, 0.385; 95% CI, 0.280–0.529;  $P < 0.001$ ) were revealed to be significant risk factors for death. Patients with COVID-19 with underlying congestive heart failure (OR, 1.724; 95% CI, 1.211–2.456;  $P = 0.003$ ), dementia (OR, 1.598; 95% CI, 1.108–2.305;  $P = 0.012$ ), diabetes with or without chronic complications (OR, 1.821; 95% CI, 1.255–2.644;  $P = 0.002$  and OR, 1.518; 95% CI, 1.063–2.169;  $P = 0.022$ , respectively), renal disease (OR, 2.299; 95% CI, 1.371–3.858;  $P = 0.002$ ), and/or malignancy (OR, 1.529; 95% CI, 1.022–2.257;  $P = 0.039$ ) were significantly at higher risk of death (Table 2 and S1 Fig).

### Significant factors for ICU admission

Univariate analysis showed that age, sex, and underlying diseases—except moderate or severe liver diseases and acquired immune deficiency syndrome—were significant factors that influenced ICU admission. Older patients (OR, 1.050; 95% CI, 1.039–1.061;  $P < 0.001$ ), males (OR for female, 0.518; 95% CI, 0.389–0.689;  $P < 0.001$ ), and patients with diabetes with chronic complications (OR, 1.811; 95% CI, 1.241–2.642;  $P = 0.002$ ) were significantly at risk of ICU admission in multivariate analysis (Table 3).

### Significant factors affecting duration of hospital stay

Age and underlying diseases—except rheumatologic disease, moderate or severe liver diseases, and acquired immune deficiency syndrome—were found to be significant factors that influenced the duration of hospital stay in univariate analysis. According to the multivariate

Table 3. Significant factors for ICU admission.

| Parameters                              | Univariate analysis |               |         | Multivariate analysis |                    |                  |
|-----------------------------------------|---------------------|---------------|---------|-----------------------|--------------------|------------------|
|                                         | OR                  | 95% CI        | P-value | OR                    | 95% CI             | P-value          |
| Age (years)                             | 1.056               | 1.048–1.065   | <0.001  | <b>1.050</b>          | <b>1.039–1.061</b> | <b>&lt;0.001</b> |
| Sex (female)                            | 0.567               | 0.432–0.745   | <0.001  | <b>0.518</b>          | <b>0.389–0.689</b> | <b>&lt;0.001</b> |
| <b>Prevalence of underlying disease</b> |                     |               |         |                       |                    |                  |
| Myocardial infarction                   | 2.272               | 1.247–4.141   | 0.007   | 0.695                 | 0.362–1.335        | 0.275            |
| Congestive heart failure                | 3.842               | 2.723–5.422   | <0.001  | 1.209                 | 0.814–1.796        | 0.347            |
| Peripheral vascular disease             | 2.896               | 2.154–3.894   | <0.001  | 1.097                 | 0.785–1.535        | 0.587            |
| Cerebrovascular disease                 | 3.201               | 2.339–4.382   | <0.001  | 1.031                 | 0.705–1.507        | 0.876            |
| Dementia                                | 3.364               | 2.387–4.741   | <0.001  | 0.771                 | 0.510–1.164        | 0.216            |
| Chronic pulmonary disease               | 1.715               | 1.304–2.258   | <0.001  | 1.087                 | 0.806–1.466        | 0.585            |
| Rheumatologic disease                   | 1.759               | 1.156–2.675   | 0.008   | 1.229                 | 0.790–1.912        | 0.362            |
| Peptic ulcer disease                    | 1.839               | 1.400–2.415   | <0.001  | 1.032                 | 0.765–1.391        | 0.836            |
| Mild liver disease                      | 2.283               | 1.737–3.001   | <0.001  | 0.985                 | 0.718–1.352        | 0.926            |
| Diabetes without chronic complications  | 3.808               | 2.898–5.005   | <0.001  | 1.294                 | 0.919–1.821        | 0.14-            |
| Diabetes with chronic complications     | 5.137               | 3.721–7.093   | <0.001  | <b>1.811</b>          | <b>1.241–2.642</b> | <b>0.002</b>     |
| Paralysis (hemiplegia or paraplegia)    | 3.219               | 1.754–5.907   | <0.001  | 1.102                 | 0.566–2.146        | 0.776            |
| Renal disease                           | 4.281               | 2.540–7.215   | <0.001  | 1.434                 | 0.813–2.531        | 0.213            |
| Malignancy                              | 3.132               | 2.203–4.453   | <0.001  | 1.406                 | 0.946–2.091        | 0.092            |
| Moderate or severe liver disease        | 2.876               | 0.675–12.248  | 0.153   | 1.364                 | 0.301–6.188        | 0.687            |
| Metastatic solid tumor                  | 3.821               | 1.627–8.973   | 0.002   | 1.810                 | 0.702–4.665        | 0.219            |
| Acquired immune deficiency syndrome     | 0.000               | 0.000–999.999 | 0.976   | 0.000                 | 0.000–999.999      | 0.983            |

Text in bold means a statistically significant difference in the multivariate analysis.

ICU, intensive care unit; OR, odds ratio; CI, confidence interval.

<https://doi.org/10.1371/journal.pone.0254258.t003>

analysis results, the duration of hospital stay was significantly lengthened when patients were old ( $\beta$  coefficient, 0.065;  $P < 0.001$ ), had concomitant cerebrovascular disease ( $\beta$  coefficient, 1.612;  $P = 0.002$ ), chronic pulmonary disease ( $\beta$  coefficient, 0.831;  $P = 0.004$ ), or paralysis ( $\beta$  coefficient, 3.285;  $P = 0.002$ ) (Table 4).

### Significant factors influencing total hospital cost

We determined that the significant factors that contributed to total hospital cost in Korean Won such as age, sex, and underlying diseases—except for moderate or severe liver diseases and acquired immune deficiency syndrome—impacted total hospital costs in univariate analysis. In multivariate analysis, old age ( $\beta$  coefficient, 60,885;  $P < 0.001$ ) and being male (female  $\beta$  coefficient, -893,143;  $P < 0.001$ ) were risk factors for increased total hospital cost. Congestive heart failure ( $\beta$  coefficient, 1,165,577;  $P < 0.001$ ), chronic pulmonary disease ( $\beta$  coefficient, 453,242;  $P = 0.004$ ), diabetes without chronic complications (1,026,449;  $P < 0.001$ ), renal disease ( $\beta$  coefficient, 1,789,702;  $P = 0.001$ ), malignancy ( $\beta$  coefficient, 922,209;  $P = 0.003$ ), and metastatic solid tumor ( $\beta$  coefficient, 2,582,275;  $P = 0.004$ ) were significant factors that increased hospital cost (Table 5).

### Discussion

The prognosis of COVID-19 was independently affected by underlying diseases, even after adjusting for age, sex, and other medical conditions. Underlying diseases are frequent in old age. In addition, some underlying diseases are significantly associated with other underlying

Table 4. Significant factors for admission duration.

| Parameters                              | Univariate analysis |         | Multivariate analysis |                  |
|-----------------------------------------|---------------------|---------|-----------------------|------------------|
|                                         | $\beta$ coefficient | P-value | $\beta$ coefficient   | P-value          |
| Age (years)                             | 0.097               | <0.001  | <b>0.065</b>          | <b>&lt;0.001</b> |
| Sex (female)                            | 0.437               | 0.125   | 0.219                 | 0.440            |
| <b>Prevalence of underlying disease</b> |                     |         |                       |                  |
| Myocardial infarction                   | 2.790               | 0.001   | 0.081                 | 0.929            |
| Congestive heart failure                | 3.746               | <0.001  | 0.686                 | 0.259            |
| Peripheral vascular disease             | 2.075               | <0.001  | -0.556                | 0.205            |
| Cerebrovascular disease                 | 4.345               | <0.001  | <b>1.612</b>          | <b>0.002</b>     |
| Dementia                                | 4.123               | <0.001  | 0.308                 | 0.611            |
| Chronic pulmonary disease               | 1.667               | <0.001  | <b>0.831</b>          | <b>0.004</b>     |
| Rheumatologic disease                   | 0.835               | 0.118   | -0.462                | 0.395            |
| Peptic ulcer disease                    | 1.540               | <0.001  | 0.172                 | 0.584            |
| Mild liver disease                      | 2.031               | <0.001  | 0.284                 | 0.392            |
| Diabetes without chronic complications  | 2.932               | <0.001  | 0.577                 | 0.152            |
| Diabetes with chronic complications     | 3.457               | <0.001  | 0.554                 | 0.365            |
| Paralysis (hemiplegia or paraplegia)    | 6.738               | <0.001  | <b>3.285</b>          | <b>0.002</b>     |
| Renal disease                           | 4.139               | <0.001  | 1.651                 | 0.093            |
| Malignancy                              | 2.940               | <0.001  | 1.038                 | 0.069            |
| Moderate or severe liver disease        | -0.392              | 0.870   | -2.589                | 0.276            |
| Metastatic solid tumor                  | 3.910               | 0.013   | 1.521                 | 0.347            |
| Acquired immune deficiency syndrome     | -5.984              | 0.194   | -7.954                | 0.081            |

Text in bold means a statistically significant difference in the multivariate analysis.

<https://doi.org/10.1371/journal.pone.0254258.t004>

diseases (for example, cerebrovascular disease and dementia; myocardial infarction and peripheral vascular disease). Therefore, a detailed analysis with adjustments was needed to determine whether underlying diseases were independent risk factors for the severity of COVID-19 presentation. To the best of our knowledge, this is the first study to confirm that underlying diseases are independent risk factors for poor prognosis of COVID-19, after adjusting for age, sex, and other chronic conditions. In addition, we also found that the prognosis and outcomes of patients with COVID-19 varied according to the type of underlying diseases that the patients had.

Underlying renal disease had the greatest effect on COVID-19 prognosis, especially death (OR, 2.299) and increased hospital cost. In renal diseases, the disturbance of toll-like receptors and alterations in the immune system contribute to immunodepression in those with said affliction [9]; such patients are more susceptible to infection and have difficulty recovering when infected. In addition, impaired renal function serves as a contraindication to the administration of pharmacologic treatment against COVID-19; or the dose of medication needs to be adjusted based on the renal function; this can lead to suboptimal treatment outcomes.

Diabetes is the next underlying disease that was found to have a significant effect on death (OR, 1.518–1.821), total hospital cost, and ICU admission of patients with COVID-19. A recent study reported that patients with diabetes are highly susceptible to COVID-19, and various mechanisms were proposed [10]. Diabetes can cause multiple metabolic and vascular abnormalities, affecting the patient's response to pathogens [11]. Uncontrolled hyperglycemia is a risk factor for infections (e.g., pneumonia and influenza) and subsequent poor outcomes; therefore, strict glycemic control is critical for infection control [11–13]. Interestingly, our findings that diabetes increases the risk for poor prognosis in COVID-19 is consistent with

Table 5. Significant factors for the total hospital cost.

| Parameters                              | Univariate analysis |         | Multivariate analysis |                  |
|-----------------------------------------|---------------------|---------|-----------------------|------------------|
|                                         | $\beta$ coefficient | P-value | $\beta$ coefficient   | P-value          |
| Age (years)                             | 74,781              | <0.001  | <b>60,885</b>         | <b>&lt;0.001</b> |
| Sex (female)                            | -693,714            | <0.001  | <b>-893,143</b>       | <b>&lt;0.001</b> |
| <b>Prevalence of underlying disease</b> |                     |         |                       |                  |
| Myocardial infarction                   | 1,374,958           | 0.005   | -864,257              | 0.083            |
| Congestive heart failure                | 3,144,068           | <0.001  | <b>1,165,577</b>      | <b>&lt;0.001</b> |
| Peripheral vascular disease             | 1,740,131           | <0.001  | 30,392                | 0.900            |
| Cerebrovascular disease                 | 1,953,548           | <0.001  | 78,942                | 0.787            |
| Dementia                                | 2,087,732           | <0.001  | -606,724              | 0.069            |
| Chronic pulmonary disease               | 1,008,164           | <0.001  | <b>453,242</b>        | <b>0.004</b>     |
| Rheumatologic disease                   | 1,022,204           | <0.001  | 140,774               | 0.638            |
| Peptic ulcer disease                    | 926,043             | <0.001  | -2451                 | 0.989            |
| Mild liver disease                      | 1,285,736           | <0.001  | -262,483              | 0.151            |
| Diabetes without chronic complications  | 2,559,127           | <0.001  | <b>1,026,449</b>      | <b>&lt;0.001</b> |
| Diabetes with chronic complications     | 2,713,274           | <0.001  | 408,814               | 0.225            |
| Paralysis (hemiplegia or paraplegia)    | 1,499,017           | 0.009   | -628,917              | 0.287            |
| Renal disease                           | 3,860,969           | <0.001  | <b>1,789,702</b>      | <b>0.001</b>     |
| Malignancy                              | 2,524,916           | <0.001  | <b>922,209</b>        | <b>0.003</b>     |
| Moderate or severe liver disease        | 903,871             | 0.500   | -938,758              | 0.473            |
| Metastatic solid tumor                  | 4,560,340           | <0.001  | <b>2,582,275</b>      | <b>0.004</b>     |
| Acquired immune deficiency syndrome     | -18,179             | 0.994   | -1,263,459            | 0.615            |

Text in bold means a statistically significant difference in the multivariate analysis.

<https://doi.org/10.1371/journal.pone.0254258.t005>

similar previous studies in other coronavirus infections such as middle east respiratory syndrome and severe acute respiratory syndrome [12,14–16].

Congestive heart failure was also found to be a significant predictive factor for poor clinical outcomes in COVID-19, including death (OR, 1.724) and increased total hospital cost. Patients with congestive heart failure frequently present with dyspnea, cough, edema, and pleural effusion. These symptoms are similar to those of COVID-19; hence, symptoms from heart failure, especially dyspnea, can be aggravated in the presence of that infection. In addition, congestive heart failure is associated with an increase in endotoxins and cytokines [17] that can trigger the cytokine storm observed in COVID-19 that can prove fatal. Therefore, COVID-19-infected patients with congestive heart failure should be carefully monitored.

Dementia is another significant factor associated with death (OR, 1.598). Our findings are in keeping with those of studies on dementia being associated with prognosis in COVID-19; one such study reported how the presence of the *ApoE e4e4* allele—the gene associated with dementia—puts a patient at risk for severe COVID-19 [18,19]. Also, patients with dementia might be uncooperative in terms of expelling sputum, allowing for monitoring of vital signs, maintaining oxygen support, and even the medication intake. These factors may lead to poor outcomes of COVID-19 in patients with dementia.

Malignancy was revealed to be one of the important risk factors for mortality (OR, 1.520) and increased hospital cost. Moreover, metastasis from solid tumors was also a risk factor affecting those outcomes. Since malignancy alters cell-mediated immunity, patients with cancer—especially those in the advanced stages—become immunocompromised, and hence more susceptible to infections, including those of viral etiology [20,21]. In addition,



immunosuppressive therapy used in cancer treatment may also contribute to failure of treatment for COVID-19.

Cerebrovascular disease and paralysis (hemiplegia or paraplegia) were revealed to be risk factors for longer hospital stay. In COVID-19, the route of infection is usually via the respiratory tract, and the cause of the death is usually a respiratory problem [22]. Patients with cerebrovascular disease or paralysis might be difficult to manage in the setting of COVID-19, as they might have problems in complying with management, including the expectoration of sputum. This may delay extubation and discharge.

Chronic pulmonary disease was also a significant factor found to contribute to increased hospital cost and prolonged hospital stay. COVID-19 is a respiratory infection, and therefore, the fact that prognosis of COVID-19 is poor in patients with chronic pulmonary disease is quite natural. However, the impact of chronic pulmonary disease on the COVID-19 were less significant compared to those of other underlying diseases. The prevalence of chronic pulmonary disease in this study was excessively high (44.6%). We followed the definition of chronic pulmonary disease as suggested in the HIRA guidelines; however, some diagnostic codes for chronic pulmonary disease in our data set might represent temporary pulmonary disease. The relatively high prevalence of chronic pulmonary disease in our study may have decreased the impact of that on the prognosis of patients with COVID-19. Further studies with a different definition of chronic pulmonary disease are needed to define its effects on the prognosis of COVID-19.

Unlike the other underlying diseases, acquired immune deficiency syndrome and moderate or severe liver disease did not show any significant effects on prognosis after adjustment. However, the number of patients with acquired immune deficiency syndrome ( $n = 7$ ) and moderate or severe liver disease ( $n = 26$ ) included in this study was too small to adequately analyze their effect on the prognosis of COVID-19. To the best of our knowledge, there are only a few studies investigating the relationship between acquired immune deficiency syndrome and COVID-19. One case series reported that the mortality rate was not high (as 5 of 5 survived) and that only 1% of patients with COVID-19 who required hospitalization had acquired immune deficiency syndrome [23]. Further research on the relationship between acquired immune deficiency syndrome and COVID-19 is needed.

As expected, age was the single most important risk factor for increased hospital cost, prolonged hospital stay, ICU admission, and mortality in this study. This finding is consistent with those of previous studies [24–28]. We also found that the male sex was also an important risk factor in the prognosis of COVID-19. Although several studies have revealed sex disparities in the prevalence and prognosis of COVID-19 [26,29,30], a recent review reported that mortality was higher in males than in females, similar to the results of this study. The differences in angiotensin converting enzyme 2 and transmembrane serine protease 2 regulation and immune response to viral infections between males and females are emerging as the potential mechanisms [29]. The cell associated forms of the above two molecules are known to be important proteins in the intracellular invasion of severe acute respiratory syndrome coronavirus 2, and various studies have reported that sex hormones, such as estrogen, regulate these two proteins [31–35].

A strength of this study is its national coverage, which includes 7,590 patients with COVID-19. Also, to the best of our knowledge, this study is the first to reveal the variable effects of underlying diseases on the prognosis of patients with COVID-19.

However, there are also some limitations to this study. First, this study did not include important clinical data such as physical examination findings and laboratory findings that may have affected the results. Second, the diagnosis of underlying diseases was simply defined by diagnostic codes. Therefore, the prevalence of underlying disease was relatively high—

especially chronic pulmonary disease—compared with that in previous studies [4]. South Korea has a national insurance system, and therefore, medical costs are relatively low. Given this, people in South Korea are admitted to the hospital for trivial symptoms such as mild cough or heartburn. This might explain why the prevalence of some underlying diseases, including chronic pulmonary and peptic ulcer diseases, seems to be higher than we expected in general population. Lastly, in the future, further studies with a larger sample size are needed to further define the effects of rare underlying diseases, including acquired immune deficiency syndrome, on COVID-19 prognosis.

## Conclusion

In conclusion, each underlying disease in this study had an independent variable effect on the clinical outcomes of COVID-19 after adjustments for age, sex, and other chronic conditions. Renal disease, diabetes, congestive heart failure, dementia, and malignancy proved to be risk factors for mortality. Cerebrovascular disease and paralysis prolonged duration of hospital stay. Chronic pulmonary disease increased total hospital cost and delayed the discharge date. In conclusion, patients with underlying diseases must be monitored more carefully because they are at a higher risk of poor outcomes while admitted for COVID-19.

## Supporting information

**S1 Fig. Odds ratio and 95% confidence interval for mortality during treatment for COVID-19 according to the type of underlying diseases.** COVID-19, coronavirus disease; CHF, congestive heart failure; DEM, dementia; DM1, diabetes without chronic complications; DM2, diabetes with chronic complications; Ren, renal disease; Mal, malignancy. (PPTX)

**S1 Table. ICD-10 coding algorithms for calculating the Charlson comorbidity index.** ICD-10, international classification of diseases, 10<sup>th</sup> Revision; AIDS, acquired immunodeficiency syndrome; HIV, human immunodeficiency virus. (DOCX)

## Acknowledgments

The authors appreciate the healthcare professionals dedicated to treating patients with COVID-19 in South Korea; the Ministry of Health and Welfare; and the Health Insurance Review & Assessment Service of Korea for sharing invaluable national health insurance claims data in a prompt manner.

## Author Contributions

**Conceptualization:** Hye Jung Park.

**Data curation:** Yong Jun Choi, Ju-Young Park, Hye Sun Lee, Jin Suh, Jeung Yoon Song, Min-Kwang Byun, Jae Hwa Cho, Hyung Jung Kim, Hye Jung Park.

**Formal analysis:** Yong Jun Choi, Ju-Young Park, Hye Sun Lee, Jin Suh, Jeung Yoon Song, Hyung Jung Kim, Hye Jung Park.

**Investigation:** Yong Jun Choi, Ju-Young Park, Hye Sun Lee, Jin Suh, Min-Kwang Byun, Jae Hwa Cho, Hye Jung Park.

**Methodology:** Yong Jun Choi, Ju-Young Park, Hye Sun Lee, Jin Suh, Jeung Yoon Song, Min-Kwang Byun, Jae Hwa Cho, Hyung Jung Kim, Hye Jung Park.

**Project administration:** Yong Jun Choi, Ju-Young Park, Hye Sun Lee, Jin Suh, Jeung Yoon Song, Hye Jung Park.

**Resources:** Yong Jun Choi, Jin Suh, Jeung Yoon Song, Min-Kwang Byun, Hye Jung Park.

**Software:** Yong Jun Choi, Ju-Young Park, Hye Sun Lee, Hye Jung Park.

**Supervision:** Hye Jung Park.

**Validation:** Yong Jun Choi, Ju-Young Park, Hye Sun Lee, Jin Suh, Min-Kwang Byun, Jae Hwa Cho, Hyung Jung Kim, Hye Jung Park.

**Visualization:** Yong Jun Choi, Hye Jung Park.

**Writing – original draft:** Yong Jun Choi, Ju-Young Park, Hye Sun Lee, Jin Suh, Jeung Yoon Song, Min-Kwang Byun, Jae Hwa Cho, Hyung Jung Kim, Hye Jung Park.

**Writing – review & editing:** Yong Jun Choi, Ju-Young Park, Hye Sun Lee, Jin Suh, Jeung Yoon Song, Min-Kwang Byun, Jae Hwa Cho, Hyung Jung Kim, Hye Jung Park.

## References

1. Calder PC, Carr AC, Gombart AF, Eggersdorfer M. Optimal Nutritional Status for a Well-Functioning Immune System Is an Important Factor to Protect against Viral Infections. *Nutrients*. 2020; 12: 1181. <https://doi.org/10.3390/nu12041181> PMID: 32340216.
2. Rezaee H, Pourkarim F, Pourtaghi-Anvarian S, Entezari-Maleki T, Asvadi-Kermani T, Nouri-Vaskeh M. Drug-drug interactions with candidate medications used for COVID-19 treatment: An overview. *Pharmacology Research & Perspectives*. 2021; 9: e00705. <https://doi.org/10.1002/prp2.705> PMID: 33421347
3. Karlamangla A, Tinetti M, Guralnik J, Studenski S, Wetle T, Reuben D. Comorbidity in older adults: nosology of impairment, diseases, and conditions. *J Gerontol A Biol Sci Med Sci*. 2007; 62: 296–300. <https://doi.org/10.1093/gerona/62.3.296> PMID: 17389727.
4. Emami A, Javanmardi F, Pirbonyeh N, Akbari A. Prevalence of Underlying Diseases in Hospitalized Patients with COVID-19: a Systematic Review and Meta-Analysis. *Arch Acad Emerg Med*. 2020; 8: e35 PMID: 32232218.
5. Kang YJ. Mortality Rate of Infection With COVID-19 in Korea From the Perspective of Underlying Disease. *Disaster Med Public Health Prep*. 2020; 1–3. <https://doi.org/10.1017/dmp.2020.60> PMID: 32228738.
6. Banerjee A, Pasea L, Harris S, Gonzalez-Izquierdo A, Torralbo A, Shallcross L, et al. Estimating excess 1-year mortality associated with the COVID-19 pandemic according to underlying conditions and age: a population-based cohort study. *Lancet*. 2020; 395: 1715–1725. [https://doi.org/10.1016/S0140-6736\(20\)30854-0](https://doi.org/10.1016/S0140-6736(20)30854-0) PMID: 32405103.
7. Charlson ME, Pompei P, Ales KL, MacKenzie CR. A new method of classifying prognostic comorbidity in longitudinal studies: development and validation. *J Chronic Dis*. 1987; 40: 373–383. [https://doi.org/10.1016/0021-9681\(87\)90171-8](https://doi.org/10.1016/0021-9681(87)90171-8) PMID: 3558716.
8. Quan H, Sundararajan V, Halfon P, Fong A, Burnand B, Luthi JC, et al. Coding algorithms for defining comorbidities in ICD-9-CM and ICD-10 administrative data. *Med Care*. 2005; 43: 1130–1139. <https://doi.org/10.1097/01.mlr.0000182534.19832.83> PMID: 16224307.
9. Kato S, Chmielewski M, Honda H, Pecoits-Filho R, Matsuo S, Yuzawa Y, et al. Aspects of immune dysfunction in end-stage renal disease. *Clin J Am Soc Nephrol*. 2008; 3: 1526–1533. <https://doi.org/10.2215/CJN.00950208> PMID: 18701615.
10. Singh AK, Gupta R, Ghosh A, Misra A. Diabetes in COVID-19: Prevalence, pathophysiology, prognosis and practical considerations. *Diabetes Metab Syndr*. 2020; 14: 303–310. <https://doi.org/10.1016/j.dsx.2020.04.004> PMID: 32298981.
11. Hussain A, Bhowmik B, do Vale Moreira NC. COVID-19 and diabetes: Knowledge in progress. *Diabetes Research and Clinical Practice*. 2020; 162: 108142. <https://doi.org/10.1016/j.diabres.2020.108142> PMID: 32278764
12. Muniyappa R, Gubbi S. COVID-19 pandemic, coronaviruses, and diabetes mellitus. *Am J Physiol Endocrinol Metab*. 2020; 318: E736–e741. <https://doi.org/10.1152/ajpendo.00124.2020> PMID: 32228322.

13. Wang B, Li R, Lu Z, Huang Y. Does comorbidity increase the risk of patients with COVID-19: evidence from meta-analysis. *Aging (Albany NY)*. 2020; 12: 6049–6057. <https://doi.org/10.18632/aging.103000> PMID: 32267833.
14. Yang JK, Feng Y, Yuan MY, Yuan SY, Fu HJ, Wu BY, et al. Plasma glucose levels and diabetes are independent predictors for mortality and morbidity in patients with SARS. *Diabet Med*. 2006; 23: 623–628. <https://doi.org/10.1111/j.1464-5491.2006.01861.x> PMID: 16759303.
15. Kulcsar KA, Coleman CM, Beck SE, Frieman MB. Comorbid diabetes results in immune dysregulation and enhanced disease severity following MERS-CoV infection. *JCI Insight*. 2019; 4. <https://doi.org/10.1172/jci.insight.131774> PMID: 31550243.
16. Nassar MS, Bakhrebah MA, Meo SA, Alsuabeyl MS, Zaher WA. Middle East Respiratory Syndrome Coronavirus (MERS-CoV) infection: epidemiology, pathogenesis and clinical characteristics. *Eur Rev Med Pharmacol Sci*. 2018; 22: 4956–4961. [https://doi.org/10.26355/eurrev\\_201808\\_15635](https://doi.org/10.26355/eurrev_201808_15635) PMID: 30070331.
17. Niebauer J, Volk HD, Kemp M, Dominguez M, Schumann RR, Rauchhaus M, et al. Endotoxin and immune activation in chronic heart failure: a prospective cohort study. *Lancet*. 1999; 353: 1838–1842. [https://doi.org/10.1016/S0140-6736\(98\)09286-1](https://doi.org/10.1016/S0140-6736(98)09286-1) PMID: 10359409.
18. Bianchetti A, Rozzini R, Guerini F, Boffelli S, Ranieri P, Minelli G, et al. Clinical Presentation of COVID19 in Dementia Patients. *J Nutr Health Aging*. 2020: 1–3. <https://doi.org/10.1007/s12603-019-1308-5> PMID: 31886800.
19. Kuo C-L, Pilling LC, Atkins JL, Masoli JAH, Delgado J, Kuchel GA, et al. APOE e4 genotype predicts severe COVID-19 in the UK Biobank community cohort. *The Journals of Gerontology: Series A*. 2020. <https://doi.org/10.1093/gerona/glaa131> PMID: 32451547
20. Persing DH, Prendergast FG. Infection, immunity, and cancer. *Arch Pathol Lab Med*. 1999; 123: 1015–1022. <https://doi.org/10.5858/1999-123-1015-IIAC> PMID: 10539899.
21. Bustamante CI, Wade JC. Herpes simplex virus infection in the immunocompromised cancer patient. *J Clin Oncol*. 1991; 9: 1903–1915. <https://doi.org/10.1200/JCO.1991.9.10.1903> PMID: 1919640.
22. Wang D, Hu B, Hu C, Zhu F, Liu X, Zhang J, et al. Clinical Characteristics of 138 Hospitalized Patients With 2019 Novel Coronavirus-Infected Pneumonia in Wuhan, China. *JAMA*. 2020. <https://doi.org/10.1001/jama.2020.1585> PMID: 32031570.
23. Blanco JL, Ambrosioni J, Garcia F, Martínez E, Soriano A, Mallolas J, et al. COVID-19 in patients with HIV: clinical case series. *The lancet. HIV*. 2020; 7: e314–e316. [https://doi.org/10.1016/S2352-3018\(20\)30111-9](https://doi.org/10.1016/S2352-3018(20)30111-9) PMID: 32304642.
24. Ruan Q, Yang K, Wang W, Jiang L, Song J. Clinical predictors of mortality due to COVID-19 based on an analysis of data of 150 patients from Wuhan, China. *Intensive Care Med*. 2020; 46: 846–848. <https://doi.org/10.1007/s00134-020-05991-x> PMID: 32125452.
25. Liu K, Fang YY, Deng Y, Liu W, Wang MF, Ma JP, et al. Clinical characteristics of novel coronavirus cases in tertiary hospitals in Hubei Province. *Chin Med J (Engl)*. 2020; 133: 1025–1031. <https://doi.org/10.1097/CM9.0000000000000744> PMID: 32044814.
26. Guan W-j, Ni Z-y, Hu Y, Liang W-h, Ou C-q, He J-x, et al. Clinical Characteristics of Coronavirus Disease 2019 in China. *New England Journal of Medicine*. 2020; 382: 1708–1720. <https://doi.org/10.1056/NEJMoa2002032> PMID: 32109013
27. Zhou F, Yu T, Du R, Fan G, Liu Y, Liu Z, et al. Clinical course and risk factors for mortality of adult inpatients with COVID-19 in Wuhan, China: a retrospective cohort study. *Lancet*. 2020; 395: 1054–1062. [https://doi.org/10.1016/S0140-6736\(20\)30566-3](https://doi.org/10.1016/S0140-6736(20)30566-3) PMID: 32171076.
28. Huang C, Wang Y, Li X, Ren L, Zhao J, Hu Y, et al. Clinical features of patients infected with 2019 novel coronavirus in Wuhan, China. *Lancet*. 2020; 395: 497–506. [https://doi.org/10.1016/S0140-6736\(20\)30183-5](https://doi.org/10.1016/S0140-6736(20)30183-5) PMID: 31986264.
29. Gebhard C, Regitz-Zagrosek V, Neuhauser HK, Morgan R, Klein SL. Impact of sex and gender on COVID-19 outcomes in Europe. *Biology of Sex Differences*. 2020; 11: 29. <https://doi.org/10.1186/s13293-020-00304-9> PMID: 32450906
30. Mo P, Xing Y, Xiao Y, Deng L, Zhao Q, Wang H, et al. Clinical characteristics of refractory COVID-19 pneumonia in Wuhan, China. *Clinical Infectious Diseases*. 2020. <https://doi.org/10.1093/cid/ciaa270> PMID: 32173725
31. Hoffmann M, Kleine-Weber H, Schroeder S, Krüger N, Herrler T, Erichsen S, et al. SARS-CoV-2 Cell Entry Depends on ACE2 and TMPRSS2 and Is Blocked by a Clinically Proven Protease Inhibitor. *Cell*. 2020; 181: 271–280.e278. <https://doi.org/10.1016/j.cell.2020.02.052> PMID: 32142651.
32. Jia HP, Look DC, Tan P, Shi L, Hickey M, Gakhar L, et al. Ectodomain shedding of angiotensin converting enzyme 2 in human airway epithelia. *Am J Physiol Lung Cell Mol Physiol*. 2009; 297: L84–96. <https://doi.org/10.1152/ajplung.00071.2009> PMID: 19411314.

33. Fischer M, Baessler A, Schunkert H. Renin angiotensin system and gender differences in the cardiovascular system. *Cardiovasc Res*. 2002; 53: 672–677. [https://doi.org/10.1016/s0008-6363\(01\)00479-5](https://doi.org/10.1016/s0008-6363(01)00479-5) PMID: [11861038](https://pubmed.ncbi.nlm.nih.gov/11861038/).
34. Regitz-Zagrosek V. Therapeutic implications of the gender-specific aspects of cardiovascular disease. *Nat Rev Drug Discov*. 2006; 5: 425–438. <https://doi.org/10.1038/nrd2032> PMID: [16672926](https://pubmed.ncbi.nlm.nih.gov/16672926/).
35. Liu J, Ji H, Zheng W, Wu X, Zhu JJ, Arnold AP, et al. Sex differences in renal angiotensin converting enzyme 2 (ACE2) activity are 17 $\beta$ -oestradiol-dependent and sex chromosome-independent. *Biol Sex Differ*. 2010; 1: 6. <https://doi.org/10.1186/2042-6410-1-6> PMID: [21208466](https://pubmed.ncbi.nlm.nih.gov/21208466/).
